# Supplementary material for: Understanding the role of depressive symptoms in academic outcomes: A longitudinal study of college roommates
Source: PubMed Central journal article supplement (PMC10241356; doi:10.1371/journal.pone.0286709), 2023-06-05
Supplement: pone.0286709.s003.pdf [file pone.0286709.s003.pdf]

**Table S1a.**

*Phase I Analyses Predicting GPA: Detailed Results Testing Students' and Roommates' T1 Depressive Symptoms predicting Students' Fall and Spring GPAs.*

|                                                         | DV: Students' Fall GPA |                |               |          |                               | DV: Students' Spring GPA |                |               |          |                               |
|---------------------------------------------------------|------------------------|----------------|---------------|----------|-------------------------------|--------------------------|----------------|---------------|----------|-------------------------------|
|                                                         | <i>b</i>               | <i>t</i> (df)  | 95% <i>CI</i> | <i>p</i> | <i>Pseudo</i><br>$\Delta R^2$ | <i>b</i>                 | <i>t</i> (df)  | 95% <i>CI</i> | <i>p</i> | <i>Pseudo</i><br>$\Delta R^2$ |
| <u>Main Effects Model</u>                               |                        |                |               |          |                               |                          |                |               |          |                               |
| Students' Standardized Test Scores                      | .23                    | 4.08 (395.31)  | [.12, .34]    | <.001    |                               | .22                      | 3.96 (388.46)  | [.11, .32]    | <.001    |                               |
| Students' T1 Depressive Symptoms                        | -.19                   | -3.90 (410.65) | [-.28, -.09]  | <.001    |                               | -.14                     | -3.01 (398.95) | [-.24, -.05]  | .003     |                               |
| Roommates' T1 Depressive Symptoms                       | -.08                   | -1.81 (409.56) | [-.18, .01]   | .072     |                               | -.03                     | -.67 (395.78)  | [-.12, .06]   | .501     |                               |
| <u>Tests of Product Terms:</u>                          |                        |                |               |          |                               |                          |                |               |          |                               |
| Model 1:                                                |                        |                |               |          |                               |                          |                |               |          |                               |
| Students' Standardized Test Scores                      | .23                    | 4.18 (382.08)  | [.12, .34]    | <.001    |                               | .22                      | 3.90 (386.84)  | [.11, .32]    | <.001    |                               |
| Students' T1 Depressive Symptoms                        | -.17                   | -3.55 (408.09) | [-.27, -.08]  | <.001    |                               | -.15                     | -3.10 (395.51) | [-.24, -.05]  | .002     |                               |
| Roommates' T1 Depressive Symptoms                       | -.08                   | -1.80 (406.80) | [-.18, .01]   | .073     |                               | -.03                     | -.70 (393.53)  | [-.12, .06]   | .485     |                               |
| Dyadic Closeness                                        | .07                    | 1.36 (223.80)  | [-.03, .17]   | .176     |                               | -.07                     | -1.33 (226.97) | [-.16, .03]   | .186     |                               |
| Students' T1 Depressive Symptoms *<br>Dyadic Closeness  | .08                    | 1.70 (412.99)  | [-.01, .17]   | .089     | <.01                          | -.04                     | -.90 (394.70)  | [-.14, .05]   | .368     | <.01                          |
| Model 2:                                                |                        |                |               |          |                               |                          |                |               |          |                               |
| Students' Standardized Test Scores                      | .23                    | 4.07 (391.47)  | [.12, .34]    | <.001    |                               | .21                      | 3.90 (387.12)  | [.11, .32]    | <.001    |                               |
| Students' T1 Depressive Symptoms                        | -.18                   | -3.78 (408.33) | [-.28, -.09]  | <.001    |                               | -.15                     | -3.19 (397.55) | [-.25, -.06]  | .002     |                               |
| Roommates' T1 Depressive Symptoms                       | -.07                   | -1.56 (407.41) | [-.17, .02]   | .119     |                               | -.03                     | -.67 (392.03)  | [-.12, .06]   | .501     |                               |
| Dyadic Closeness                                        | .07                    | 1.30 (222.10)  | [-.03, .17]   | .196     |                               | -.06                     | -1.24 (224.50) | [-.16, .04]   | .216     |                               |
| Roommates' T1 Depressive Symptoms *<br>Dyadic Closeness | .03                    | .61 (412.98)   | [-.06, .12]   | .537     | <.01                          | .05                      | 1.22 (399.22)  | [-.03, .14]   | .224     | <.01                          |

Note: All variables are standardized. To test product terms, we added the main effect of closeness and the relevant product term to the original main effects model. All product terms were tested in separate models.

**Table S1b.**

Phase 1 Analyses Predicting Withdrawal: Detailed Results Testing Students' and Roommates' T1 Depressive Symptoms Predicting Students' Fall and Spring Withdrawal.

|                                                      | DV: Students' Fall Withdrawals |        |                   |          | DV: Students' Spring Withdrawals |        |                   |          |
|------------------------------------------------------|--------------------------------|--------|-------------------|----------|----------------------------------|--------|-------------------|----------|
|                                                      | B                              | Exp(B) | 95% CI for Exp(B) | <i>p</i> | B                                | Exp(B) | 95% CI for Exp(B) | <i>p</i> |
| <u>Main Effects Model</u>                            |                                |        |                   |          |                                  |        |                   |          |
| Students' T1 Depressive Symptoms                     | .47                            | 1.60   | [1.15, 2.22]      | .005     | .38                              | 1.46   | [1.14, 1.86]      | .002     |
| Roommates' T1 Depressive Symptoms                    | -.08                           | .92    | [.69, 1.23]       | .571     | .01                              | 1.01   | [.77, 1.33]       | .936     |
| <u>Tests of Product Terms:</u>                       |                                |        |                   |          |                                  |        |                   |          |
| Model 1:                                             |                                |        |                   |          |                                  |        |                   |          |
| Students' T1 Depressive Symptoms                     | .47                            | 1.61   | [1.15, 2.25]      | .006     | .34                              | 1.40   | [1.09, 1.80]      | .008     |
| Roommates' T1 Depressive Symptoms                    | -.06                           | .94    | [.70, 1.26]       | .676     | .01                              | 1.01   | [.77, 1.33]       | .958     |
| Dyadic Closeness                                     | .17                            | 1.18   | [.82, 1.71]       | .366     | -.10                             | .91    | [.69, 1.20]       | .502     |
| Students' T1 Depressive Symptoms * Dyadic Closeness  | -.12                           | .89    | [.66, 1.20]       | .447     | -.11                             | .90    | [.73, 1.11]       | .323     |
| Model 2:                                             |                                |        |                   |          |                                  |        |                   |          |
| Students' T1 Depressive Symptoms                     | .49                            | 1.63   | [1.17, 2.28]      | .004     | .37                              | 1.44   | [1.13, 1.83]      | .003     |
| Roommates' T1 Depressive Symptoms                    | -.08                           | .92    | [.70, 1.23]       | .586     | -.01                             | .99    | [.75, 1.31]       | .955     |
| Dyadic Closeness                                     | .11                            | 1.12   | [.81, 1.55]       | .5041    | -.12                             | .89    | [.68, 1.15]       | .356     |
| Roommates' T1 Depressive Symptoms * Dyadic Closeness | -.06                           | .95    | [.74, 1.21]       | .648     | -.03                             | .97    | [.77, 1.22]       | .806     |

Note: All variables are standardized. To test product terms, we added the main effect of closeness and the relevant product term to the original main effects model. All product terms were tested in separate models.
