# Supplementary material for: Understanding the role of depressive symptoms in academic outcomes: A longitudinal study of college roommates
Source: PubMed Central journal article supplement (PMC10241356; doi:10.1371/journal.pone.0286709), 2023-06-05
Supplement: pone.0286709.s004.pdf [file pone.0286709.s004.pdf]

**Table S2a****Phase 2 Analyses Predicting GPA: Detailed Results Testing GPA Contagion Within the Fall and Spring Semesters**

|                                                                                            | DV: Students' Fall GPA |                |               |          |                               | DV: Students' Spring GPA |                |               |          |                               |
|--------------------------------------------------------------------------------------------|------------------------|----------------|---------------|----------|-------------------------------|--------------------------|----------------|---------------|----------|-------------------------------|
|                                                                                            | <i>b</i>               | <i>t</i> (df)  | 95% <i>CI</i> | <i>p</i> | <i>Pseudo</i><br>$\Delta R^2$ | <i>b</i>                 | <i>t</i> (df)  | 95% <i>CI</i> | <i>p</i> | <i>Pseudo</i><br>$\Delta R^2$ |
| <u>Main Effects Model</u>                                                                  |                        |                |               |          |                               |                          |                |               |          |                               |
| Students' Standardized Test Scores                                                         | .22                    | 3.57 (370)     | [.10, .34]    | <.001    |                               | .23                      | 3.83 (335.93)  | [.11, .35]    | <.001    |                               |
| Roommates' Standardized Test Scores                                                        | -.03                   | -.55 (356.54)  | [-.16, .09]   | .584     |                               | -.02                     | -.29 (310.40)  | [-.13, .10]   | .776     |                               |
| Roommates' Fall/Spring GPA                                                                 | .19                    | 3.79 (333.86)  | [.09, .28]    | <.001    |                               | .20                      | 4.22 (278.48)  | [.11, .30]    | <.001    |                               |
| <u>Main Effects Model, Controlling for Students' and Roommates' T1 Depressive Symptoms</u> |                        |                |               |          |                               |                          |                |               |          |                               |
| Students' Standardized Test Scores                                                         | .21                    | 3.45 (368.94)  | [.09, .33]    | .001     |                               | .22                      | 3.71 (337.96)  | [.10, .34]    | <.001    |                               |
| Roommates' Standardized Test Scores                                                        | -.04                   | -.68 (356.27)  | [-.16, .08]   | .500     |                               | -.02                     | -.35 (312.67)  | [-.14, .10]   | .727     |                               |
| Students' T1 Depressive Symptoms                                                           | -.18                   | -3.64 (373.98) | [-.28, -.08]  | <.001    |                               | -.14                     | -2.69 (351.99) | [-.24, -.04]  | .007     |                               |
| Roommates' T1 Depressive Symptoms                                                          | -.06                   | -1.26 (343.03) | [-.16, .04]   | .209     |                               | -.03                     | -.68 (299.98)  | [-.13, .06]   | .497     |                               |
| Roommates' Fall/Spring GPA                                                                 | .16                    | 3.20 (335.46)  | [.06, .26]    | .001     |                               | .19                      | 3.97 (286.83)  | [.10, .29]    | <.001    |                               |
| <u>Tests of Product Terms:</u>                                                             |                        |                |               |          |                               |                          |                |               |          |                               |
| Students' Standardized Test Scores                                                         | .23                    | 3.73 (367.92)  | [.11, .35]    | <.001    |                               | .23                      | 3.87 (334.56)  | [.11, .35]    | <.001    |                               |
| Roommates' Standardized Test Scores                                                        | -.04                   | -.66 (354.79)  | [-.16, .08]   | .508     |                               | -.02                     | -.35 (309.33)  | [-.14, .10]   | .730     |                               |
| Roommates' Fall/Spring GPA                                                                 | .20                    | 4.05 (334.09)  | [.10, .30]    | <.001    |                               | .18                      | 3.74 (284.68)  | [.09, .28]    | <.001    |                               |
| Dyadic Closeness                                                                           | .09                    | 1.82 (364.33)  | [-.01, .19]   | .070     |                               | -.00                     | -.08 (238.84)  | [-.10, .09]   | .937     |                               |
| Roommates' Fall/Spring GPA * Dyadic Closeness                                              | .10                    | 2.22 (313.33)  | [.01, .19]    | .028     | .01                           | .10                      | 2.43 (276.78)  | [.02, .19]    | .016     | .02                           |

Note: All variables are standardized. To test product terms, we added the main effect of closeness and the relevant product term to the original main effects model. All product terms were tested in separate models.

**Table S2b****Phase 2 Analyses Predicting Withdrawal: Detailed Results Testing Withdrawal Contagion Within the Fall and Spring Semesters**

|                                                         | DV: Students' Fall Withdrawal |        |                      |          |                               | DV: Students' Spring Withdrawal |        |                      |          |                               |
|---------------------------------------------------------|-------------------------------|--------|----------------------|----------|-------------------------------|---------------------------------|--------|----------------------|----------|-------------------------------|
|                                                         | B                             | Exp(B) | 95% CI for<br>Exp(B) | <i>p</i> | <i>Pseudo</i><br>$\Delta R^2$ | B                               | Exp(B) | 95% CI for<br>Exp(B) | <i>p</i> | <i>Pseudo</i><br>$\Delta R^2$ |
| <u>Main Effects Model, Controlling for Students' T1</u> |                               |        |                      |          |                               |                                 |        |                      |          |                               |
| <u>Depressive Symptoms</u>                              |                               |        |                      |          |                               |                                 |        |                      |          |                               |
| Students' T1 Depressive Symptoms                        | .49                           | 1.63   | [1.21, 2.20]         | .001     |                               | .40                             | 1.49   | [1.49, 1.93]         | .003     |                               |
| Roommates' Fall/Spring Withdrawal                       | 1.10                          | 3.00   | [1.26, 7.10]         | .013     |                               | -.34                            | .71    | [.29, 1.75]          | .461     |                               |
| <u>Tests of Product Terms:</u>                          |                               |        |                      |          |                               |                                 |        |                      |          |                               |
| Roommates' Fall/Spring Withdrawal                       | 1.02                          | 1.25   | [1.17, 6.51]         | .020     |                               | -.47                            | .63    | [.23, 1.70]          | .356     |                               |
| Dyadic Closeness                                        | .23                           | .70    | [.87, 1.82]          | .232     |                               | -.04                            | .96    | [.72, 1.29]          | .799     |                               |
| Roommates' Fall/Spring Withdrawal * Dyadic<br>Closeness | -.36                          | .08    | [.27, 1.83]          | .464     | <.01                          | -.35                            | .70    | [.29, 1.72]          | .439     | <.01                          |

Note: All variables are standardized. To test product terms, we added the main effect of closeness and the relevant product term to the original main effects model. All product terms were tested in separate models.

**Table S2c****Phase 2 Analyses: Detailed Results Testing Closeness Moderating Contagion of Depressive Symptoms at T1, T2, and T3**

|                                                         | DV: Students' Depressive Symptoms |               |               |          | DV: Students' Depressive Symptoms |                |               |          | <i>Pseudo</i><br>$\Delta R^2$ |
|---------------------------------------------------------|-----------------------------------|---------------|---------------|----------|-----------------------------------|----------------|---------------|----------|-------------------------------|
|                                                         | <i>b</i>                          | <i>t</i> (df) | 95% <i>CI</i> | <i>p</i> | <i>b</i>                          | <i>t</i> (df)  | 95% <i>CI</i> | <i>p</i> |                               |
| <u>T1 Contagion of Depressive Symptoms</u>              |                                   |               |               |          |                                   |                |               |          |                               |
| Roommates' T1 Depressive Symptoms<br>Dyadic Closeness   | .03                               | .59 (428.81)  | [-.06, .11]   | .593     | .02                               | .48 (431.38)   | [-.07, .11]   | .631     |                               |
| Roommates' T1 Depressive Symptoms *<br>Dyadic Closeness |                                   |               |               |          | -.12                              | -2.67 (471.34) | [-.21, -.03]  | .008     |                               |
|                                                         |                                   |               |               |          | .07                               | 1.75 (447)     | [-.01, .16]   | .081     | <.01                          |
| <u>T2 Contagion of Depressive Symptoms</u>              |                                   |               |               |          |                                   |                |               |          |                               |
| Roommates' T2 Depressive Symptoms<br>Dyadic Closeness   | .12                               | 2.61 (334.12) | [.03, .21]    | .009     | .11                               | 2.35 (335.05)  | [.02, .20]    | .019     |                               |
| Roommates' T2 Depressive Symptoms *<br>Dyadic Closeness |                                   |               |               |          | .01                               | .12 (383.43)   | [-.10, .11]   | .905     |                               |
|                                                         |                                   |               |               |          | .14                               | 2.70 (340.31)  | [.04, .24]    | .007     | .02                           |
| <u>T3 Contagion of Depressive Symptoms</u>              |                                   |               |               |          |                                   |                |               |          |                               |
| Roommates' T3 Depressive Symptoms<br>Dyadic Closeness   | .12                               | 2.48 (380.35) | [.02, .22]    | .014     | .11                               | 2.34 (388.03)  | [.02, .21]    | .020     |                               |
| Roommates' T3 Depressive Symptoms *<br>Dyadic Closeness |                                   |               |               |          | .04                               | .75 (400.61)   | [-.06, .14]   | .454     |                               |
|                                                         |                                   |               |               |          | .10                               | 2.13 (362.53)  | [.01, .20]    | .034     | <.01                          |

Note: All variables are standardized. Complete results for main effects are reported in the manuscript. To test product terms, we added the main effect of closeness and the relevant product term to the original main effects model. All product terms were tested in separate models.
