# Supplementary material for: Understanding the role of depressive symptoms in academic outcomes: A longitudinal study of college roommates
Source: PubMed Central journal article supplement (PMC10241356; doi:10.1371/journal.pone.0286709), 2023-06-05
Supplement: pone.0286709.s005.pdf [file pone.0286709.s005.pdf]

**S3 Table****Correlations Between Individual Items Used to Assess Dyadic Closeness**

|             | 1.     | 2.     | 3.     | 4.     | 5.     |
|-------------|--------|--------|--------|--------|--------|
| 1. Close1_A |        |        |        |        |        |
| 2. Close2_A | .74*** |        |        |        |        |
| 3. Close3_A | .76*** | .70*** |        |        |        |
| 4. Close1_P | .54*** | .42*** | .53*** |        |        |
| 5. Close2_P | .42*** | .33*** | .41*** | .74*** |        |
| 6. Close3_P | .53*** | .41*** | .51*** | .76*** | .70*** |

Note. \*\*\*  $p < .001$ . Close1\_A and Close1\_P: “How close do you feel to your roommate?”  
Close2\_A and Close2\_P: “Relative to all your other relationships (both same and opposite sex),  
how would you characterize your relationship with your roommate?” Close3\_A and Close3\_P:  
“Relative to what you know about other people’s roommate relationships, how would you  
characterize your relationship with your roommate?”
